# Supplementary material for: Binding energies of the drugs capreomycin and streptomycin in complex with tuberculosis bacterial ribosome subunits
Source: Royal Society of Chemistry journal article supplement (doi:10.1039/c9cp03631h), 2019-01-01
Supplement: c9cp03631h1.pdf [file c9cp03631h1.pdf]

## Electronic Supplementary Information

### Binding energies of the drugs Capreomycin and Streptomycin in complex with tuberculosis bacterial ribosome subunits

Jessica F. Vianna, Katyanna S. Bezerra, Jonas I.N. Oliveira, Eudenilson L. Albuquerque, and Umberto L. Fulco\*  
*Departamento de Biofísica e Farmacologia, Universidade Federal do Rio Grande do Norte, 59072-970, Natal-RN, Brazil*

---

\* Corresponding author, e-mail: [umbertofulco@gmail.com](mailto:umbertofulco@gmail.com); Tel: +55-84-32153793; Fax: +55-84-32153791

| Capreomycin - 30S |                                                   |      |        | Capreomycin - 50S |                                            |      |        |
|-------------------|---------------------------------------------------|------|--------|-------------------|--------------------------------------------|------|--------|
| Residue           | Atomic group                                      | $r$  | Energy | Residue           | Atomic group                               | $r$  | Energy |
| C26               | i(C)O                                             | 2    | -11.71 | A1913             | ii(NH)OH                                   | 2    | -25.26 |
| A1408             | iii(NH <sub>4</sub> <sup>+</sup> )NH <sub>3</sub> | 2.5  | -12.83 | C1914             | v(NH <sub>2</sub> )C                       | 2.5  | -9.01  |
| G1491             | iii(NH <sub>4</sub> <sup>+</sup> )NH <sub>3</sub> | 2.5  | -19.27 | A1912             | ii(C)OH                                    | 6    | -3.80  |
| A1492             | iv(C)C                                            | 2.5  | -14.75 | U1915             | v(NH <sub>2</sub> )C                       | 6.5  | -4.58  |
| A1493             | ii(OH)H; iv (NH)O                                 | 2.5  | -29.69 | A1916             | iii(O)NH <sub>2</sub>                      | 9    | -3.24  |
| G1494             | ii(NH <sub>4</sub> <sup>+</sup> )N                | 2.5  | -26.94 | U1917             | iii(O)NH <sub>2</sub>                      | 12   | -2.47  |
| A36               | ii(NH <sub>4</sub> <sup>+</sup> )N                | 3    | -9.66  | U1911             | ii(C)OH; i(NH <sub>4</sub> <sup>+</sup> )O | 12.5 | -2.56  |
| C1409             | iii(NH)O                                          | 3.5  | -5.96  | A1918             | ii(C)C                                     | 12.5 | -2.98  |
| A25               | i(C)O                                             | 3.5  | -5.95  | A1919             | iii(NH <sub>2</sub> )C                     | 13   | -2.98  |
| G1410             | v(O) C                                            | 5    | -4.84  | C1920             | ii(C)C; iii(C)C                            | 16   | -2.76  |
| C27               | v(O) C                                            | 5.5  | -3.89  | G1910             | i(NH <sub>2</sub> ) OH                     | 17.5 | -3.63  |
| G35               | i(C)OH                                            | 5.5  | -4.08  | G1921             | ii(C)C                                     | 20   | -3.92  |
| U38               | i(NH <sub>4</sub> <sup>+</sup> )C                 | 5.5  | -5.90  | C1962             | iii(NH <sub>2</sub> )P                     | 23   | -2.95  |
| C1407             | iii(NH <sub>4</sub> <sup>+</sup> )NH <sub>2</sub> | 6    | -1.94  | C1909             | i(NH <sub>4</sub> <sup>+</sup> )O          | 23.5 | -2.48  |
| U1495             | iii(NH <sub>4</sub> <sup>+</sup> )C               | 6    | -4.10  | G1922             | ii(C)C                                     | 24   | -3.33  |
| C24               | i(C)O                                             | 6    | -4.05  | C1961             | iii(C)O                                    | 24.5 | -2.17  |
| C1490             | iii(C)NH <sub>2</sub>                             | 7    | -2.34  | U1963             | iii(NH <sub>2</sub> )O                     | 24.5 | -3.64  |
| C39               | i(NH <sub>4</sub> <sup>+</sup> )NH <sub>2</sub>   | 7    | -2.43  | U1946             | iii(O)OH                                   | 26   | -1.70  |
| A30               | i(NH <sub>4</sub> <sup>+</sup> )NH <sub>2</sub>   | 8    | -2.15  | C1947             | iii(O)C                                    | 26   | -2.32  |
| C519              | iv(C)O                                            | 8.5  | -4.34  | C1908             | iii(O)NH <sub>2</sub>                      | 27   | -2.12  |
| C1411             | v(O)O                                             | 8.5  | -2.14  | G1948             | iii(O)C                                    | 27.5 | -3.48  |
| G530              | iv(NH <sub>4</sub> <sup>+</sup> )NH <sub>2</sub>  | 9    | -3.09  | G1945             | v(O)NH <sub>2</sub>                        | 28   | -1.30  |
| U1406             | iii(NH <sub>4</sub> <sup>+</sup> )O               | 9    | -1.72  | A1932             | v(NH <sub>2</sub> )O                       | 28.5 | -1.83  |
| C1496             | iii(NH <sub>4</sub> <sup>+</sup> )NH <sub>2</sub> | 9    | -2.20  | G1933             | iii(NH <sub>2</sub> )O                     | 28.5 | -3.32  |
| G28               | i(NH <sub>4</sub> <sup>+</sup> )O                 | 9    | -3.84  | G1935             | iii(NH <sub>2</sub> )O                     | 28.5 | -2.93  |
| C40               | i(NH <sub>4</sub> <sup>+</sup> )NH <sub>2</sub>   | 9    | -2.50  | U1923             | iii(O)O                                    | 28.5 | -1.87  |
| C518              | iv(NH <sub>4</sub> <sup>+</sup> )OH               | 9.5  | -3.08  | U1931             | iii(O)C                                    | 29   | -1.97  |
| G1489             | iii(C)O                                           | 10   | -2.36  | C1934             | iii(NH <sub>2</sub> )NH <sub>2</sub>       | 29   | -2.38  |
| G10               | i(NH <sub>4</sub> <sup>+</sup> )C                 | 10   | -2.29  | G1964             | iii(NH <sub>2</sub> )O; v(O)O              | 30   | -4.46  |
| G529              | iv(C)NH                                           | 10.5 | -2.14  | G1907             | iii(O)O                                    | 30   | -1.26  |
| G1405             | iii(NH <sub>4</sub> <sup>+</sup> )O               | 10.5 | -1.87  |                   |                                            |      |        |
| U31               | i(NH <sub>4</sub> <sup>+</sup> )NH                | 10.5 | -2.61  |                   |                                            |      |        |
| G42               | i(C)NH                                            | 10.5 | -2.41  |                   |                                            |      |        |
| A520              | iv(C)O                                            | 11   | -2.50  |                   |                                            |      |        |
| C1404             | iii(NH <sub>4</sub> <sup>+</sup> )NH <sub>2</sub> | 11   | -1.72  |                   |                                            |      |        |
| C11               | v(NH <sub>2</sub> )H                              | 11   | -2.20  |                   |                                            |      |        |
| U34               | i(C)OH                                            | 11   | -2.59  |                   |                                            |      |        |
| G23               | i(NH <sub>4</sub> <sup>+</sup> )OH                | 11.5 | -2.65  |                   |                                            |      |        |
| G1497             | iii(NH <sub>4</sub> <sup>+</sup> )O               | 12   | -3.26  |                   |                                            |      |        |
| C1412             | v(O)C                                             | 12.5 | -3.87  |                   |                                            |      |        |
| G29               | i(NH <sub>4</sub> <sup>+</sup> )O                 | 12.5 | -3.47  |                   |                                            |      |        |
| U32               | i(NH <sub>4</sub> <sup>+</sup> )O                 | 12.5 | -2.63  |                   |                                            |      |        |
| G521              | iv(C)N                                            | 13   | -2.87  |                   |                                            |      |        |
| C1403             | iii(NH <sub>4</sub> <sup>+</sup> )NH <sub>2</sub> | 14   | -2.54  |                   |                                            |      |        |

TABLE S1. Residue Atomic group, radius (in Å) and the interaction energies (in kcal/mol) of the anti-tuberculosis drug capreomycin in complex with the 30S and 50S tuberculosis bacterial ribosome subunits.

| Streptomycin - 30S |                               |      |        | S12 protein |                                                                      |      |        |
|--------------------|-------------------------------|------|--------|-------------|----------------------------------------------------------------------|------|--------|
| Residue            | Atomic group                  | r    | Energy | Residue     | Atomic group                                                         | r    | Energy |
| U14                | iii(O)O                       | 2    | -4.25  | LYS47       | i(OH)C                                                               | 2    | 1.80   |
| G527               | iii(N)O                       | 2    | -10.67 | LYS46       | i(OH)NH <sub>4</sub> <sup>+</sup>                                    | 2.5  | 4.13   |
| C912               | i(O)O                         | 2    | -16.07 | PRO48       | ii(C)C                                                               | 2.5  | -12.58 |
| A913               | i(NH <sub>2</sub> )O          | 2    | -19.84 | LYS91       | ii(O)C                                                               | 2.5  | 8.62   |
| A914               | i(NH <sub>2</sub> )O; iii(N)O | 2    | -38.71 | ASP92       | ii(C)OH                                                              | 5.5  | -19.08 |
| C1490              | i(NH <sub>2</sub> )O          | 2    | -19.68 | PRO94       | i(NH <sub>2</sub> )C                                                 | 5.5  | -69.20 |
| A915               | i(NH <sub>2</sub> )P          | 2.5  | -9.01  | ASN49       | ii(C)NH <sub>3</sub>                                                 | 6    | -24.36 |
| G1491              | i(NH <sub>2</sub> )O          | 2.5  | -10.01 | ARG89       | i(C)NH <sub>3</sub> ; ii(O)NH <sub>4</sub> <sup>+</sup>              | 7    | -38.63 |
| U12                | iii(N)O                       | 3    | -2.76  | PRO45       | ii(C)C                                                               | 8    | -15.54 |
| U13                | iii(O)O                       | 3    | -7.54  | LEU93       | ii(C)NH <sub>3</sub>                                                 | 8.5  | -54.92 |
| C526               | iii(N)O                       | 3    | -2.96  | ARG53       | ii(C)NH <sub>3</sub>                                                 | 9    | 1.78   |
| U911               | i(NH)O                        | 4    | -2.82  | VAL90       | ii(C)O                                                               | 9.5  | -0.01  |
| G886               | i(NH <sub>2</sub> )H          | 4.5  | -2.52  | GLY95       | i(OH)NH <sub>3</sub>                                                 | 9.5  | 0.01   |
| G1489              | i(NH <sub>2</sub> )H          | 4.5  | -2.67  | SER50       | ii(C)NH <sub>3</sub>                                                 | 10   | -0.07  |
| G15                | iii(O)O                       | 5    | -3.29  | THR44       | ii(C)O                                                               | 11   | -0.03  |
| C525               | ii(O)H                        | 5.5  | -2.44  | VAL96       | i(OH)NH <sub>3</sub>                                                 | 11   | -0.06  |
| A523               | ii(O)N                        | 6    | -1.71  | ALA51       | ii(C)NH <sub>3</sub>                                                 | 12.5 | -0.07  |
| G885               | i(NH <sub>2</sub> )H          | 6.5  | -1.83  | ARG97       | i(OH)C                                                               | 13   | 1.71   |
| G887               | i(NH <sub>2</sub> )H          | 6.5  | -3.00  | VAL43       | i(OH)C; ii(C)C                                                       | 13   | 0.02   |
| G916               | i(NH <sub>2</sub> )P          | 6.5  | -3.96  | LYS23       | i(C)NH <sub>4</sub> <sup>+</sup> ; ii(O)NH <sub>4</sub> <sup>+</sup> | 13.5 | 1.82   |
| A1492              | i(H)O                         | 6.5  | -3.95  | HIS99       | ii(C)C                                                               | 14   | -0.06  |
| A16                | iii(O)O                       | 7    | -2.61  | TYR69       | ii(C)C                                                               | 14.5 | -0.04  |
| G22                | ii(H)N                        | 7    | -1.86  | LEU52       | ii(C)NH <sub>3</sub>                                                 | 15   | 0.08   |
| C528               | ii(O)O                        | 7    | -2.47  | THR67       | i(OH)C                                                               | 15   | -0.03  |
| G11                | iii(C)H                       | 8    | -1.92  | GLY88       | ii(O)C                                                               | 15   | 0.05   |
| A1396              | iii(O)O                       | 8    | -2.67  |             |                                                                      |      |        |
| C1403              | iii(O)P                       | 8    | -3.13  |             |                                                                      |      |        |
| G21                | iii(C)N                       | 8.5  | -1.52  |             |                                                                      |      |        |
| C522               | ii(C)N                        | 8.5  | -1.57  |             |                                                                      |      |        |
| C1397              | iii(O)C                       | 8.5  | -2.51  |             |                                                                      |      |        |
| C1395              | i(NH <sub>2</sub> )O          | 9    | -2.61  |             |                                                                      |      |        |
| G1410              | i(C)N                         | 9    | -1.36  |             |                                                                      |      |        |
| C23                | ii(C)O                        | 10   | -2.39  |             |                                                                      |      |        |
| G505               | iii(C)NH <sub>2</sub>         | 10   | -1.53  |             |                                                                      |      |        |
| G524               | ii(C)O                        | 10   | -1.86  |             |                                                                      |      |        |
| G529               | ii(C)O                        | 10   | -2.14  |             |                                                                      |      |        |
| G888               | i(NH <sub>2</sub> )C          | 10   | -2.44  |             |                                                                      |      |        |
| C910               | i(C)H                         | 10   | -1.98  |             |                                                                      |      |        |
| C1402              | iii(OH)C                      | 10   | -2.42  |             |                                                                      |      |        |
| C1404              | i(N)P                         | 10   | -2.91  |             |                                                                      |      |        |
| G1488              | iii(N)P                       | 10   | -1.62  |             |                                                                      |      |        |
| U24                | ii(O)C                        | 10.5 | -2.06  |             |                                                                      |      |        |
| G506               | ii(O)NH <sub>2</sub>          | 10.5 | -1.53  |             |                                                                      |      |        |
| C518               | ii(O)NH <sub>2</sub>          | 10.5 | -1.89  |             |                                                                      |      |        |
| A535               | ii(O)C                        | 10.5 | -2.04  |             |                                                                      |      |        |
| U17                | iii(OH)O                      | 11   | -2.16  |             |                                                                      |      |        |
| G521               | ii(C)O                        | 11   | -1.49  |             |                                                                      |      |        |
| A1394              | i(NH <sub>2</sub> )O          | 11   | -2.08  |             |                                                                      |      |        |
| C18                | iii(OH)O                      | 11.5 | -1.68  |             |                                                                      |      |        |
| C19                | iii(OH)NH <sub>2</sub>        | 11.5 | -1.63  |             |                                                                      |      |        |
| G1401              | iii(OH)O                      | 11.5 | -1.75  |             |                                                                      |      |        |
| G1405              | iii(OH)P                      | 11.5 | -2.60  |             |                                                                      |      |        |

TABLE S2. Residue Atomic group, radius (in Å) and the interaction energies (in kcal/mol) of the anti-tuberculosis drug streptomycin in complex with the 30S tuberculosis bacterial ribosome subunit and the and S12 protein.
